# Supplementary material for: A new sodium vanadyl fluorophosphate as a high-rate and stable cathode for aqueous hybrid sodium–zinc batteries
Source: Royal Society of Chemistry journal article supplement (doi:10.1039/d2cc02790a), 2022-01-01
Supplement: d2cc02790a1.pdf [file d2cc02790a1.pdf]

## Electronic Supplementary Information

### **A new sodium vanadyl fluorophosphate as high-rate and stable cathode for aqueous hybrid sodium-zinc batteries**

Xun Zhao,<sup>a</sup> Lei Mao,<sup>a</sup> Qihui Cheng,<sup>a</sup> Fangfang Liao,<sup>a</sup> Guiyuan Yang,<sup>a</sup> and Lingyun Chen<sup>a\*</sup>

<sup>a</sup> School of Chemistry and Chemical Engineering, Chongqing University, Chongqing 400044, P. R.

China

\*Corresponding author. E-mail: [lychen@cqu.edu.cn](mailto:lychen@cqu.edu.cn)

## Experimental section

**Materials preparation:** A facile solvothermal method was used to prepare the  $\text{Na}_x(\text{VO})_2(\text{PO}_4)_y\text{F}_z$  sample. Simply, 0.7 mL (*ca.* 10 mmol)  $\text{H}_3\text{PO}_4$ , 3.782 g (30 mmol)  $\text{H}_2\text{C}_2\text{O}_4 \cdot 2\text{H}_2\text{O}$ , 0.84 g (20 mmol) NaF, and 1.82 g (10 mmol)  $\text{V}_2\text{O}_5$  were successively added into the mixed solution of 30 mL distilled water and 30 mL absolute ethanol. After stirring for 30 min, the dispersion solution was transferred into a Teflon-lined stainless-steel autoclave (100 mL, Anhui Kemi Machinery Technology Co., Ltd.) and then heated to 180 °C for 12 h. The as-obtained dark gray products were washed with distilled water for three times and then dried at 80 °C for 12 h. The possible solvothermal reactions of the formation of  $\text{Na}_x(\text{VO})_2(\text{PO}_4)_y\text{F}_z$  are listed as the following equations:

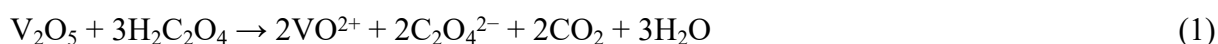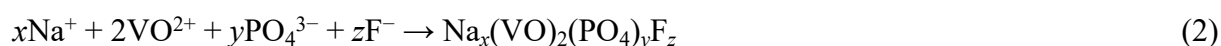

**Materials characterization:** The crystalline phase of the sample was identified by X-ray diffraction (XRD) and the XRD patterns were recorded by a Bruker D8 Advance powder diffractometer using Cu K $\alpha$  radiation ( $\lambda = 1.5406 \text{ \AA}$ ). Inductively coupled plasma optical emission spectrometer (ICP-OES, Thermo Scientific ICAP 6300) was used to analyze the elemental content of the sample. Thermogravimetric analysis (TGA) was performed to investigate the structural water content of the sample under Ar gas flow with the heating rate of 5 °C min<sup>-1</sup> by using a thermal analyzer (Mettler Toledo TGA2). X-ray photoelectron spectroscopy (XPS) experiments were conducted on an ESCALAB 250Xi electron spectrometer. The morphology and dimensions of the sample were observed by scanning electron microscopy (SEM, Quattro S), and field-emission transmission electron microscope (TEM, Talos F200S) was used to characterize the high-resolution TEM (HRTEM) image, selected area electron diffraction (SAED), and element mapping as well as energy dispersive spectrometry (EDS).

**Electrochemical measurements:** For the preparation of cathode, 10 wt.% polyvinylidene fluoride, 20 wt.% acetylene black, and 70 wt.% active materials were successively dispersed in N-methyl-2-pyrrolidone and the resultant slurry was uniformly pasted onto the titanium foil. After being dried at 80 °C under a vacuum for 12 h, the mass loading of the active materials was about 3.0-4.0 mg cm<sup>-2</sup>. The “water-in-bisalts” electrolyte, 15 m (mol kg<sup>-1</sup>) NaClO<sub>4</sub> + 1 m Zn(OTf)<sub>2</sub>, was prepared by adding 10.535 g (75 mmol) NaClO<sub>4</sub>·H<sub>2</sub>O into 3.75 mL distilled water under sonication and then 1.818 g (5 mmol) Zn(OTf)<sub>2</sub> was added for further sonication time of 30 min. The aqueous hybrid sodium-zinc batteries were assembled in air, in which 15 m NaClO<sub>4</sub> + 1 m Zn(OTf)<sub>2</sub> “water-in-bisalts” solution, zinc foil, and glass fiber filter (Whatman, GF/D) respectively served as electrolyte, anode, and separator. Galvanostatic charge-discharge (GCD) tests in a potential window of 0.4-2.2 V (vs. Zn<sup>2+</sup>/Zn) were performed with a LAND battery testing system (CT3001A) for studying rate and cyclic performance. Galvanostatic intermittent titration technique (GITT) was employed to determine the Zn<sup>2+</sup> diffusion coefficient ( $D_{Zn^{2+}}$ ) within a charge/discharge time of 10 min and followed by a relaxation time of 60 min at a current density of 50 mA g<sup>-1</sup>. Cyclic voltammetry (CV, 0.4-2.2 V) and electrochemical impedance spectroscopy (EIS, 100 kHz to 0.01 Hz) measurements were conducted on a CHI760E electrochemical workstation.

**Table S1** The lattice parameters, cell volumes, and atomic sites of the  $\text{Na}_x(\text{VO})_2(\text{PO}_4)_y\text{F}_z$ .

|                    |                         |                         |                          |                             |
|--------------------|-------------------------|-------------------------|--------------------------|-----------------------------|
| Symmetry           | Tetragonal              |                         |                          |                             |
| Space group        | $I_4/mmm$               |                         |                          |                             |
| Lattice parameters | $a = 6.392 \text{ \AA}$ | $b = 6.392 \text{ \AA}$ | $c = 10.632 \text{ \AA}$ | $V = 434.433 \text{ \AA}^3$ |
|                    | $\alpha = 90^\circ$     | $\beta = 90^\circ$      | $\gamma = 90^\circ$      |                             |
| Rp                 | 4.41                    |                         |                          |                             |
| Rwp                | 5.61                    |                         |                          |                             |
| Rexp               | 4.90                    |                         |                          |                             |
| Chi2               | 1.31                    |                         |                          |                             |
| Name               | x                       | y                       | z                        | occupancy                   |
| V1                 | 0                       | 0                       | 0.19708                  | 0.125                       |
| Na2                | 0.21813                 | 0.50000                 | 0                        | 0.016                       |
| Na1                | 0.27208                 | 0.27208                 | 0                        | 0.172                       |
| P1                 | 0                       | 0.50000                 | 0.25000                  | 0.125                       |
| O1                 | 0                       | 0.30809                 | 0.16269                  | 0.500                       |
| O2                 | 0                       | 0                       | 0.35579                  | 0.125                       |
| F1                 | 0                       | 0                       | 0                        | 0.062                       |

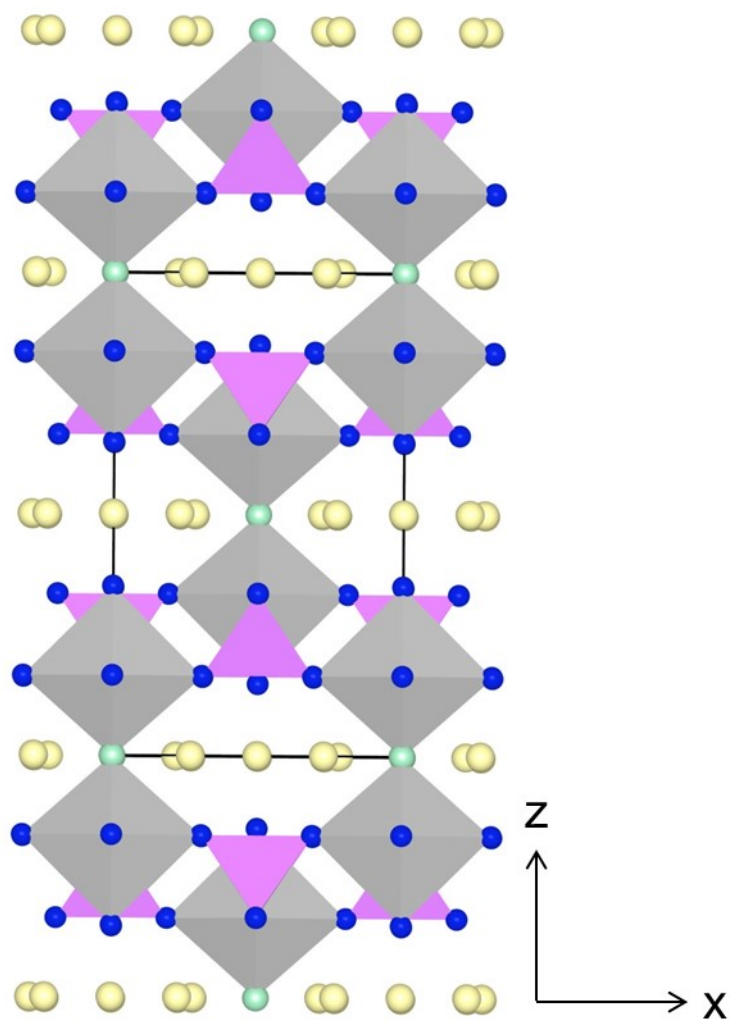

**Fig. S1** The crystal structure of  $\text{Na}(\text{VO})_2(\text{PO}_4)_{1.5}\text{F}_{0.5}$ , in which the sodium, oxygen, and fluorine are respectively yellow, blue, and green, and vanadium and phosphorus are inside the respective gray  $\text{VO}_6$  octahedrons and pink  $\text{PO}_4$  tetrahedron.

**Table S2** The ICP-OES data of the  $\text{Na}_x(\text{VO})_2(\text{PO}_4)_y\text{F}_z$ .

| Element | Detected mass content (%) | Atomic ratio |
|---------|---------------------------|--------------|
| Na      | 6.93                      | 1.04         |
| V       | 29.5                      | 2            |
| P       | 13.14                     | 1.46         |

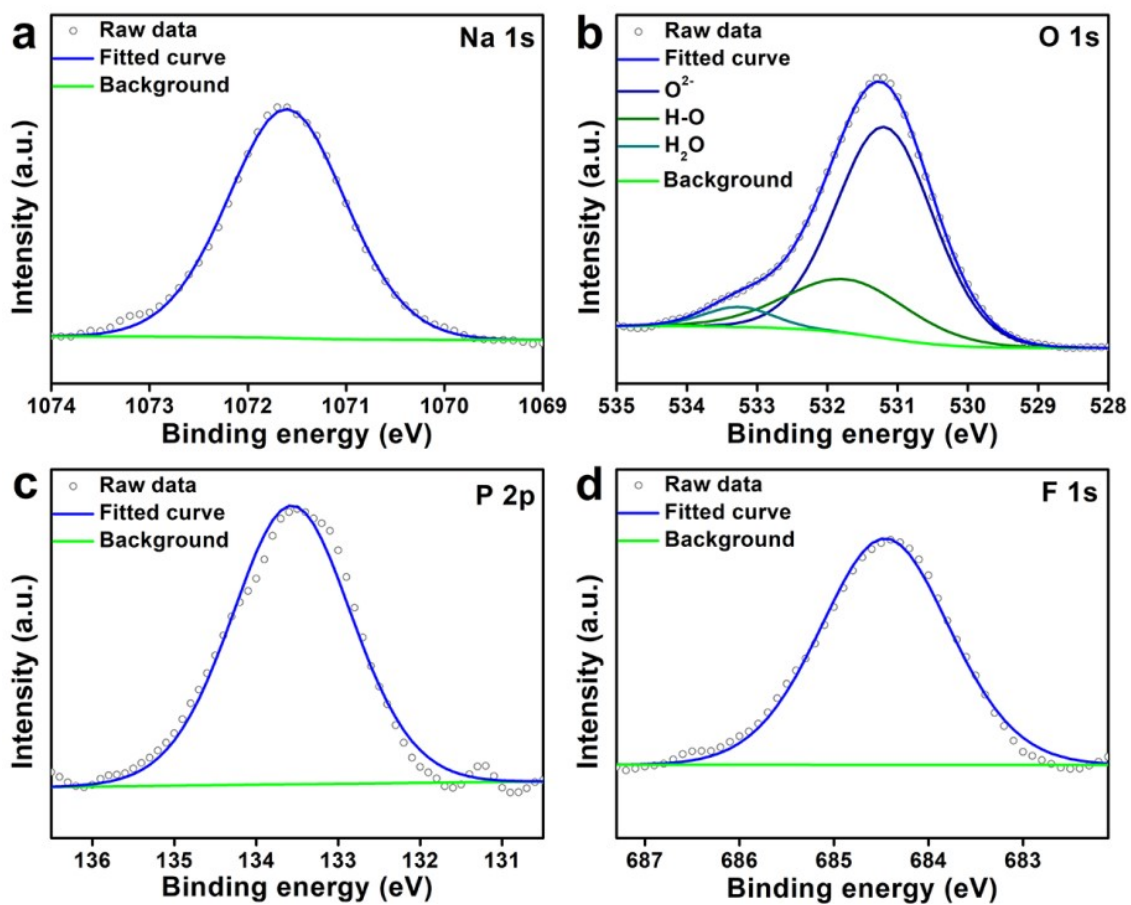

**Fig. S2** (a) Na 1s, (b) O 1s, (c) P 2p, and (d) F 1s region of  $\text{Na}(\text{VO})_2(\text{PO}_4)_{1.5}\text{F}_{0.5}$ .

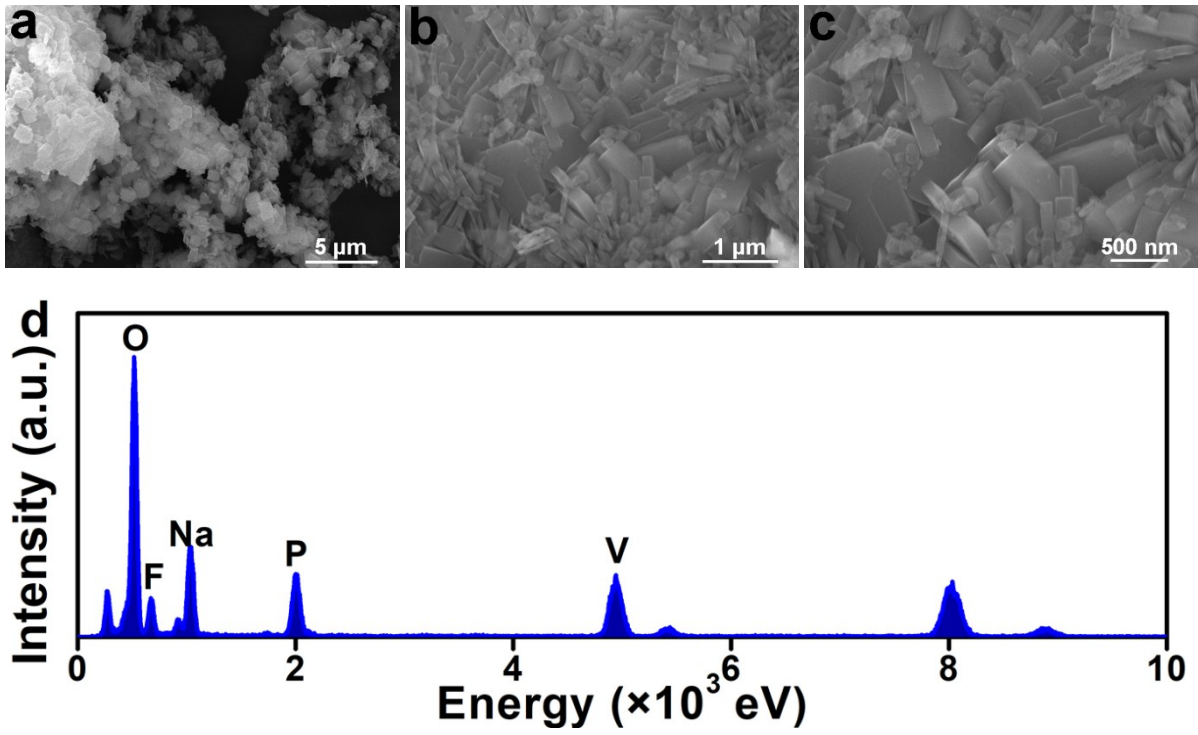

Fig. S3 (a-c) SEM images under different magnification and (d) EDS of  $\text{Na}(\text{VO})_2(\text{PO}_4)_{1.5}\text{F}_{0.5}$ .



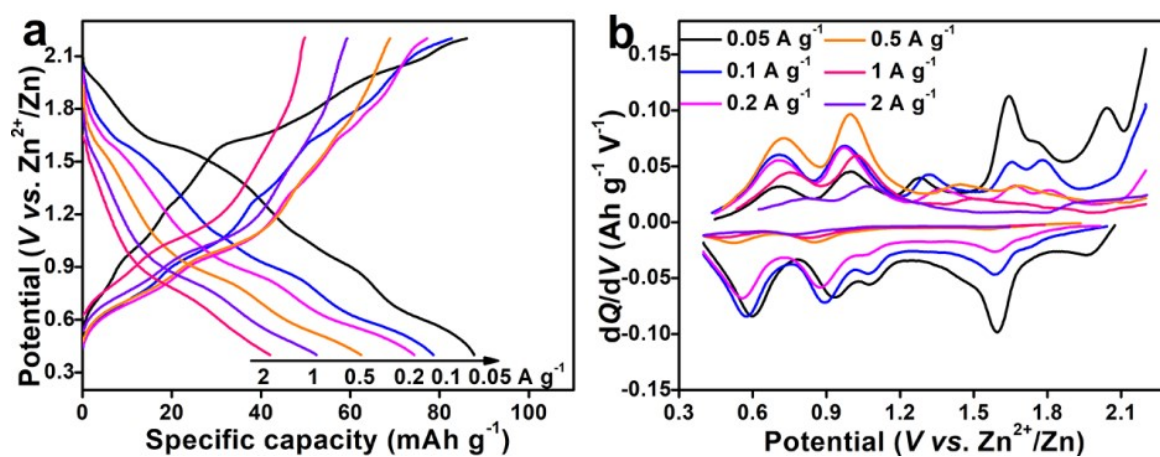

**Fig. S4** (a) GCD curves and (b) differential capacity curves of Zn-Na(VO)<sub>2</sub>(PO<sub>4</sub>)<sub>1.5</sub>F<sub>0.5</sub> battery at different current densities from 0.05 to 2 A g<sup>-1</sup>.

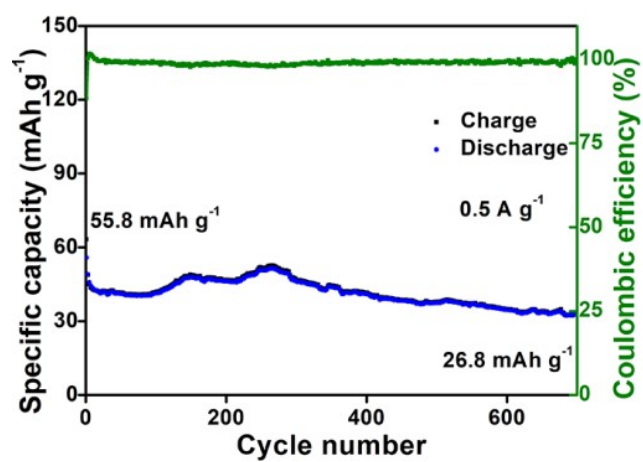

**Fig. S5** (a) Cyclic performance and coulombic efficiency of Zn-Na(VO)<sub>2</sub>(PO<sub>4</sub>)<sub>1.5</sub>F<sub>0.5</sub> battery at 0.5 A g<sup>-1</sup>.

**Table S3** Comparison of specific capacity and energy density of Na(VO)<sub>2</sub>(PO<sub>4</sub>)<sub>1.5</sub>F<sub>0.5</sub> as cathode with other advanced vanadium-based phosphate and fluorophosphate cathodes for aqueous batteries

| Vanadium-based fluorophosphate cathode                                                           | Electrolyte                                                                              | Specific capacity<br>(current density)                 | Energy density<br>(Wh kg <sup>-1</sup> ) | Power density<br>(W kg <sup>-1</sup> ) | Ref.      |
|--------------------------------------------------------------------------------------------------|------------------------------------------------------------------------------------------|--------------------------------------------------------|------------------------------------------|----------------------------------------|-----------|
| Carbon-coated NaVPO <sub>4</sub> F                                                               | 15 m NaClO <sub>4</sub> + 1 m Zn(CF <sub>3</sub> SO <sub>3</sub> ) <sub>2</sub>          | 88.9 mAh g <sup>-1</sup><br>(0.05 A g <sup>-1</sup> )  | 113                                      | 68                                     | 1         |
| Na <sub>3</sub> V <sub>2</sub> (PO <sub>4</sub> ) <sub>2</sub> O <sub>1.6</sub> F <sub>1.4</sub> | 25 m ZnCl <sub>2</sub> + 5 m NH <sub>4</sub> Cl                                          | 155 mAh g <sup>-1</sup><br>(0.05 A g <sup>-1</sup> )   | –                                        | –                                      | 2         |
| VPO <sub>4</sub> F                                                                               | ZnCl <sub>2</sub> -(NH <sub>2</sub> ) <sub>2</sub> CO ionic liquid                       | 120 mAh g <sup>-1</sup><br>(0.02 C)                    | –                                        | –                                      | 3         |
| KVOPO <sub>4</sub>                                                                               | 4 m Zn(CF <sub>3</sub> SO <sub>3</sub> ) <sub>2</sub>                                    | 89.2 mAh g <sup>-1</sup><br>(0.1 A g <sup>-1</sup> )   | –                                        | –                                      | 4         |
| PPy-VOPO <sub>4</sub>                                                                            | 1 M Zn(CF <sub>3</sub> SO <sub>3</sub> ) <sub>2</sub> / acetonitrile with 10% vol% water | 76 mAh g <sup>-1</sup><br>(0.05 A g <sup>-1</sup> )    | –                                        | –                                      | 5         |
| H <sub>0.6</sub> (VO) <sub>3</sub> (PO <sub>4</sub> ) <sub>3</sub> ·3H <sub>2</sub> O            | 3 M ZnSO <sub>4</sub>                                                                    | 50 mAh g <sup>-1</sup> (0.1 A g <sup>-1</sup> )        | –                                        | –                                      | 6         |
| VOPO <sub>4</sub> -Gr heterostructures                                                           | 1 M Zn(CF <sub>3</sub> SO <sub>3</sub> ) <sub>2</sub> / acetonitrile                     | 110 mAh g <sup>-1</sup><br>(0.05 A g <sup>-1</sup> )   | –                                        | –                                      | 7         |
| S-VOPO <sub>4</sub>                                                                              | 30 m ZnCl <sub>2</sub>                                                                   | 207 mAh g <sup>-1</sup><br>(0.1 A g <sup>-1</sup> )    | –                                        | –                                      | 8         |
| Mn <sub>0.25</sub> (VO) <sub>0.75</sub> PO <sub>4</sub> ·2H <sub>2</sub> O                       | 3 M Zn(CF <sub>3</sub> SO <sub>3</sub> ) <sub>2</sub>                                    | 207.7 mAh g <sup>-1</sup><br>(0.1 A g <sup>-1</sup> )  | –                                        | –                                      | 9         |
| Na(VO) <sub>2</sub> (PO <sub>4</sub> ) <sub>1.5</sub> F <sub>0.5</sub>                           | 15 m NaClO <sub>4</sub> + 1 m Zn(CF <sub>3</sub> SO <sub>3</sub> ) <sub>2</sub>          | 105.9 mAh g <sup>-1</sup><br>(0.05 A g <sup>-1</sup> ) | 130.23                                   | 61.5                                   | This work |

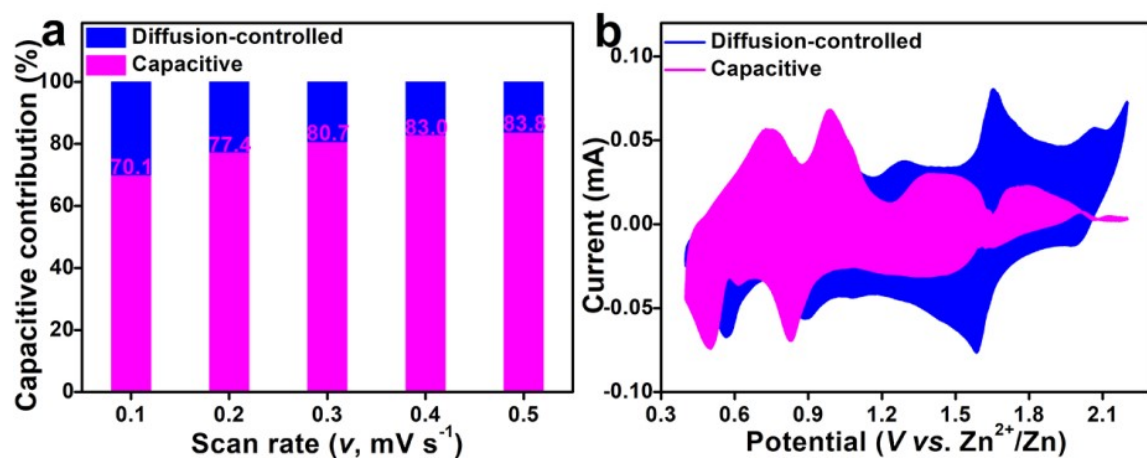

**Fig. S6** (a) The surface-controlled capacitive contribution at different scan rate from 0.1 to 0.5 mV s<sup>-1</sup>; (b) the CV curves containing the capacitive contribution at 0.1 mV s<sup>-1</sup>.

**Table S4** Comparison of the resistance values measured at pristine, 10<sup>th</sup>, and 4000<sup>th</sup> cycle.

| State                    | $R_s$ ( $\Omega$ ) | $R_{ct}$ ( $\Omega$ ) | $Z_w$ ( $\Omega$ )     | $R_{SEI}$ ( $\Omega$ ) |
|--------------------------|--------------------|-----------------------|------------------------|------------------------|
| Pristine                 | 0.888              | 494.4                 | $6.227 \times 10^{-3}$ | 1.319                  |
| 10 <sup>th</sup> cycle   | 1.364              | 28.09                 | $1.358 \times 10^{-2}$ | 8.256                  |
| 4000 <sup>th</sup> cycle | 1.408              | 102.1                 | $1.980 \times 10^{-2}$ | 4.826                  |

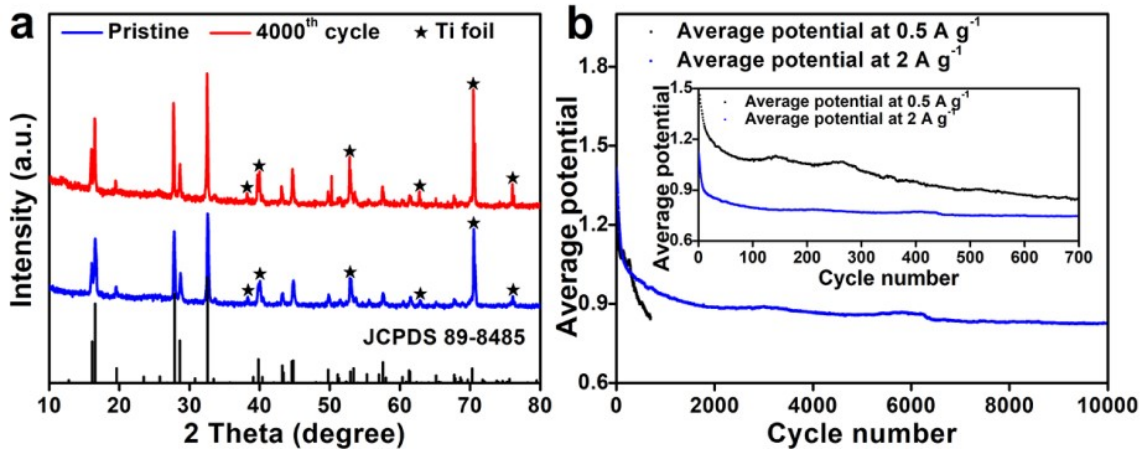

**Fig. S7** (a) XRD patterns at pristine state and after 4000 cycles; (b) the average discharge potential at the current density of 0.5 and 2 A g<sup>-1</sup>.

## References

1. Y. Shen, B. Liu, X. Liu, J. Liu, J. Ding, C. Zhong and W. Hu, *Energy Storage Mater.*, 2021, **34**, 461-474.
2. Q. Ni, H. Jiang, S. Sandstrom, Y. Bai, H. Ren, X. Wu, Q. Guo, D. Yu, C. Wu and X. Ji, *Adv. Funct. Mater.*, 2020, **30**, 2003511.
3. H. Yaghoobnejad Asl, S. Sharma and A. Manthiram, *J. Mater. Chem. A*, 2020, **8**, 8262-8267.
4. K. Zhu, Z. Sun, P. Liu, H. Li, Y. Wang, K. Cao and L. Jiao, *J. Energy Chem.*, 2021, **63**, 239-245.
5. V. Verma, S. Kumar, W. Manalastas, J. Zhao, R. Chua, S. Meng, P. Kidkhunthod and M. Srinivasan, *ACS Appl. Energy Mater.*, 2019, **2**, 8667-8674.
6. Y. De Luna and N. Bensalah, *Front. Mater.*, 2021, **8**, 645915.
7. P. Xiong, F. Zhang, X. Zhang, S. Wang, H. Liu, B. Sun, J. Zhang, Y. Sun, R. Ma, Y. Bando, C. Zhou, Z. Liu, T. Sasaki and G. Wang, *Nat. Commun.*, 2020, **11**, 3297.
8. M. Zhang, Y. Pei, R. Liang, R. Gao, Y.-P. Deng, Y. Hu, Z. Chen and A. Yu, *Nano Energy*, 2022, **98**, 107268.
9. J. Guo, W. Ma, Z. Sang, X. Zhang, J. Liang, F. Hou, W. Si, S. Wang and D. a. Yang, *Chem. Eng. J.*, 2022, **428**, 132644.
